# Supplementary material
Source: PubMed Central journal article supplement (PMC4366642)
Supplement: ijbsv11p0434s1.pdf [file ijbsv11p0434s1.pdf]

1 **Supplementary Information**

2 **(Table S1) Supplementary Table 1.** Genotypes of pups from  $Ttc9a^{+/-} \times Ttc9a^{+/-}$  crosses.

3

| Genotype                | $Ttc9a^{+/+}$ | $Ttc9a^{+/-}$ | $Ttc9a^{-/-}$ | Total |
|-------------------------|---------------|---------------|---------------|-------|
| Actual number of pups   | 74            | 138           | 64            | 276   |
| Expected number of pups | 69            | 138           | 69            | 276   |

4

5 **Table S1. Genotypes of pups from  $Ttc9a^{+/-} \times Ttc9a^{+/-}$  crosses.** The table shows total number  
6 of  $Ttc9a^{+/+}$ ,  $Ttc9a^{+/-}$  and  $Ttc9a^{-/-}$  offspring obtained after  $Ttc9a^{+/-} \times Ttc9a^{+/-}$  crosses. The  
7  $Ttc9a$  KO mice follows the predicted Medelian ratio (1:2:1) of inheritance.

8

9 **(Table S2) Supplementary Table 2.** Number of Male and Female pups from  $Ttc9A$  KO  
10 mice crossing.

| Genotype                         | Male | Female |
|----------------------------------|------|--------|
| $Ttc9a^{+/+} \times Ttc9a^{+/+}$ | 69   | 50     |
| $Ttc9a^{+/-} \times Ttc9a^{+/-}$ | 140  | 147    |
| $Ttc9a^{-/-} \times Ttc9a^{-/-}$ | 84   | 50     |

11

12 **Table S2. Number of male and female pups from  $Ttc9A$  KO mice crosses.** There is no  
13 significant difference in the male and female offspring ratios from  $Ttc9a^{+/+} \times Ttc9a^{+/+}$ ,  
14  $Ttc9a^{+/-} \times Ttc9a^{+/-}$  and  $Ttc9a^{-/-} \times Ttc9a^{-/-}$  crosses.

15

16 **(Table S3) Supplementary Table 3.** Organ Weights of female  $Ttc9a$  KO mice at 3 weeks  
17 and 6 weeks of age

18

| Organ   | $Ttc9a^{+/+}$           | $Ttc9a^{+/-}$        | $Ttc9a^{-/-}$        | $Ttc9a^{+/+}$           | $Ttc9a^{+/-}$         | $Ttc9a^{-/-}$        |
|---------|-------------------------|----------------------|----------------------|-------------------------|-----------------------|----------------------|
| Age     | 3 week- organ mass (mg) |                      |                      | 6 week- organ mass (mg) |                       |                      |
| Spleen  | 0.0604 ±<br>0.000619    | 0.0627 ±<br>0.004079 | 0.074 ±<br>0.002590  | 0.0648 ±<br>0.004819    | 0.0703 ±<br>0.003590  | 0.0759 ±<br>0.006917 |
| Kidneys | 0.0696 ±<br>0.001337    | 0.0728 ±<br>0.001890 | 0.0727 ±<br>0.004035 | 0.1069 ±<br>0.005984    | 0.1065 ±<br>0.004204  | 0.1220 ±<br>0.009583 |
| Thymus  | 0.0520 ±<br>0.003201    | 0.0578 ±<br>0.005812 | 0.0565 ±<br>0.009552 | 0.0674 ±<br>0.004291    | 0.0865 ±<br>0.0045728 | 0.0896 ±<br>0.003007 |
| Heart   | 0.0578 ±<br>0.002126    | 0.0588 ±<br>0.001903 | 0.0589 ±<br>0.002884 | 0.0926±<br>0.005776     | 0.0873 ±<br>0.002823  | 0.0967 ±<br>0.006940 |

|          |                       |                         |                      |                      |                       |                       |
|----------|-----------------------|-------------------------|----------------------|----------------------|-----------------------|-----------------------|
| Stomach  | 0.0687 ±<br>0.003315  | 0.0738 ±<br>0.002961    | 0.0805 ±<br>0.004722 | 0.1176 ±<br>0.011668 | 0.1186 ±<br>0.003533  | 0.1190 ±<br>0.004169  |
| Lungs    | 0.0913 ±<br>0.003422  | 0.0866 ±<br>0.004208    | 0.0999 ±<br>0.005481 | 0.1265 ±<br>0.004363 | 0.1251 ±<br>0.003467  | 0.1311 ±<br>0.005735  |
| Pancreas | 0.1049 ±<br>0.007229  | 0.1151 ±<br>0.005352    | 0.1145 ±<br>0.009117 | 0.2300 ±<br>0.016154 | 0.2629 ±<br>0.0188402 | 0.2669 ±<br>0.0190639 |
| Uterus   | 0.0178 ±<br>0.001901  | 0.0201 ±<br>0.0009015   | 0.0183 ±<br>0.001628 | 0.0744 ±<br>0.016912 | 0.0810 ±<br>0.017344  | 0.0765 ±<br>0.006829  |
| Brain    | 0.43268 ±<br>0.005449 | 0.4411875 ±<br>0.004340 | 0.4302 ±<br>0.005763 | 0.4421 ±<br>0.009069 | 0.4405 ±<br>0.008608  | 0.4683 ±<br>0.013383  |

19

20 **Table S3. Organ Weights of *Ttc9a* KO mice at 3 wk and 6 wk of development.** A total of  
 21 nine organ weights were recorded. The spleen and thymus showed significant increase in  
 22 mass in the *Ttc9a*<sup>-/-</sup> mice compared to *Ttc9a*<sup>+/+</sup> mice. Also there was an overall increase in the  
 23 organ mass in the *Ttc9a*<sup>-/-</sup> mouse line compared to *Ttc9a*<sup>+/+</sup>.

24

25 **(Table S4) Supplementary Table 4.** Tables showing the details of the animals in each study.

26

27 **Supplementary Table 4A.** The number of animals, gender and genotypes tabulated for body  
 28 weights at the Post natal day 2 of development (Figure2A).

29

| Genotype     | Gender | Postnatal day 2 |
|--------------|--------|-----------------|
| Wild-type    | Female | 9               |
| Wild-type    | Male   | 7               |
| Heterozygous | Female | 12              |
| Heterozygous | Male   | 7               |
| Homozygous   | Female | 9               |
| Homozygous   | Male   | 6               |

30

31 **Supplementary Table 4B.** The number of animals, gender and genotypes recorded for body  
 32 weights at the seven different stages of development (Figure 2B and 2C)

33

| Genotype     | Gender | 4 wk | 6 wk | 7 wk | 9 wk | 10 wk | 11 wk | 12 wk |
|--------------|--------|------|------|------|------|-------|-------|-------|
| Wild-type    | Female | 10   | 10   | 10   | 4    | 4     | 4     | 4     |
|              | Male   | 7    | 2    | 4    | 4    | 3     | 3     | 2     |
| Heterozygous | Female | 12   | 16   | 6    | 6    | 6     | 6     | 6     |

|            |        |    |   |   |   |   |   |   |
|------------|--------|----|---|---|---|---|---|---|
|            | Male   | 18 | 5 | 5 | 5 | 5 | 5 | 5 |
| Homozygous | Female | 8  | 9 | 4 | 4 | 4 | 4 | 4 |
|            | Male   | 18 | 7 | 7 | 7 | 7 | 7 | 7 |

34  
35 **Supplementary Table 4C.** The number of animals and genotypes recorded for spleen and  
36 thymus organ weights at 3 wk and 6 wk of development (Figure 2D and 2E)

37

| Genotype     | Gender | 3 wk | 6 wk |    |
|--------------|--------|------|------|----|
| Wild-type    | Female | 5    | 7    | 38 |
| Heterozygous | Female | 8    | 10   | 39 |
| Homozygous   | Female | 5    | 5    | 40 |
|              |        |      |      | 41 |
|              |        |      |      | 42 |
|              |        |      |      | 43 |
|              |        |      |      | 44 |
|              |        |      |      | 45 |

46 **Supplementary Table 4D.** Total number of animals and genotypes analyzed for mammary  
47 gland morphometry at 3 wk and 6 wk of development (Figure 3)

48

| Genotype     | Gender | 3 wk | 6 wk |    |
|--------------|--------|------|------|----|
| Wild-type    | Female | 3    | 9    | 49 |
| Heterozygous | Female | 7    | 7    | 50 |
| Homozygous   | Female | 5    | 12   | 51 |
|              |        |      |      | 52 |
|              |        |      |      | 53 |
|              |        |      |      | 54 |
|              |        |      |      | 55 |

56

57 **Supplementary Table 4E.** Total number of animals and genotypes analyzed for control,  
58 Estradiol Benzoate and Estradiol Benzoate plus progesterone study (Figure 4)

59

| Genotype   | Gender | Treatment                            | Number of animals |
|------------|--------|--------------------------------------|-------------------|
| Wild       | Female | Control                              | 12                |
| Wild       | Female | Estradiol Benzoate                   | 6                 |
| Wild       | Female | Estradiol Benzoate plus progesterone | 11                |
| Homozygous | Female | Control                              | 16                |
| Homozygous | Female | Estradiol Benzoate                   | 7                 |
| Homozygous | Female | Estradiol Benzoate plus progesterone | 13                |

60

61 **Table S4. Tabulation showing number of animals in each study.** The tables show the  
62 different number of animals, gender and genotypes used for each study conducted in this  
63 paper.
